# Supplementary material for: Rehabilitation Service Assessment and Workforce Capacity Building in Albania—A Civil Society Approach
Source: MDPI journal article supplement (doi:10.3390/ijerph17197300), 2020-10-06
Supplement: s1 [file s1]

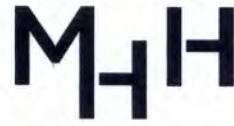

**Medizinische Hochschule  
Hannover**

**Ethikkommission  
Vorsitzender:  
Prof. Dr. Stefan Engeli**

MHH Ethikkommission OE 9515  
30623 Hannover

Sekretariat:

Marion Lange  
Telefon: 0511 532-3443

Liane Höft  
Telefon: 0511 532-9812

Fax: 0511 532-16 3443  
ethikkommission@mh-hannover.de

Carl-Neuberg-Straße 1  
30625 Hannover  
Telefon: 0511 532-0  
www.mh-hannover.de

**Manuscript "Rehabilitation Service Assessment and Workforce Capacity Building in Albania – A Civil Society Approach"**

To the Editor

Prof. Gutenbrunner addressed me with a question forwarded from the *International Journal of Environmental Research and Public Health* regarding his above mentioned manuscript. As Chairman of the Ethics Committee of Hannover Medical School, I want to clarify that this project is not a study in the general medical meaning, and therefore, based on the German Medical Association's professional code of conduct, no ethic committee approval is necessary. However, having checked the content of the manuscript, I do not see any concern from the point of view of Medical Ethics.

With kind regards

Prof. Stefan Engeli

Chairman

Ethic Committee of Hannover Medical School
